# Supplementary material for: The first fullerene–heterofullerene dyad
Source: Royal Society of Chemistry journal article supplement (doi:10.1039/b315006b), 2004-01-01
Supplement: b315006b.doc [file b315006b.doc]

# – Supplementary Information –

# “The First Fullerene-Heterofullerene Dyad”

To probe the excited state interactions between the two fullerene cores we first conducted a series of steady-state and time-resolved fluorescence surveys. Typically wavelengths in the 350 nm region were used to photoexcite **3**, since here the absorptions of the C60 core are nearly twice as high as that of the C59N core.

In steady state fluorescence experiments, **3** reveals dual fluorescence, namely, that stemming from C60 and C59N around 705 nm and 825 nm, respectively. Figure S1 compares the fluorescence spectrum of **3** with solutions of the two references – **4**, which exhibits the same absorption cross-section at the excitation wavelength than that of **3** (i.e., corrected for the different C60 / C59N absorption partition), and **5**, whose absolute absorption is identical to that of **3** (i.e., not corrected). Both fluorescence quantum yields are on the order of 1.5  0.1  10-4. The blue fluorescence, which corresponds to that of C60, with a quantum yield of 1.4  10-4 is strongly quenched relative to a value of 6.0  10-4 measured in a C60 reference (**4**). The fluorescence lifetime is also reduced from 1.3 ns in the reference (**4**) to 0.3 ns in the dyad (**3**). The two experiments indicate a rapid deactivation of the C60-based fluorescence features.

Analyzing, on the other hand, the C59N fluorescence in the red, we found nearly matching quantum yields (1.6  10-4) in the reference (**5**) and dyad (**3**). Please note that only a third of the incident photons reach the C59N core directly. Therefore, the identical quantum yields imply that the two thirds of the incident photons that are been absorbed initially by the C60 core must have been transferred quantitatively to the C59N moiety. The long fluorescence lifetime of 1.1 ns attests that the C59N singlet decay, once populated, is then not impacted by the neighboring C60. Excitation around 820 nm, where the C60 core lacks any significant absorption at all, led to C59N fluorescence quantum yields that are identical in the reference (**5**) and the dyad (**3**).

In conclusion of the fluorescence data we summarize the following mechanistic picture: Upon photoexciting **3** in the 350 nm range both fullerene cores are excited with an overall ratio of about 2:1 (i.e., C60 / C59N). Then a rapid transduction of singlet excited state energy from the C60 core (1.76 eV) to the C59N core (1.5 eV) follows exothermically with a driving force of 0.26 eV. The fate of the C59N singlet excited state in **3** seems, however, to be identical to that of the reference.

Transient absorption measurements were employed to corroborate the fluorescence assignment and also to shed light onto the fate of the C59N singlet excited state. The C60 and C59N references (i.e., **4** and **5**) each have very distinct singlet absorption features, which are summarized in Figure S2. Exciting **3** at 355 nm we see predominantly the singlet features of the C60 core at 880 nm, which is well in accordance with the light partition in the ground state spectra. Instead of the slow decay dynamics (5.0  108 s-1), which are govern by intersystem crossing kinetics to the triplet manifold, the singlet transitions decay rather fast. Analysis at different wavelengths provided a rate constant of 3.1  0.5  109 s-1 for the C60 singlet decay. Product of this fast transformation is the singlet excited state of the C59N-core, as are deduced from a set of maxima at 740 and 940 nm – similar to Figure S3. In **3** the C59N singlet is metastable and decays with a rate of 9.1  108 s-1 to the triplet manifold. The transients recorded at the end of the picosecond time scale (i.e., 6000 ps) and at the beginning

of the nanosecond time scale (i.e., 20 ns) are identical. They are displayed for the nanosecond case in Figure S3 – as can be seen, no residual triplet absorption of the C60 core is left, which would exhibit maxima at 360 and 720 nm with extinction coefficients of ~ 20,000 M-1cm-1. Instead, the spectral changes are solely that of the C59N triplet. In an independent experiment we determined that the quantum yield for the overall energy transfer is close to 100 %.

**Figure S1**: Room temperature fluorescence spectra of **4**, **5**, and **3** in toluene following 350 nm excitation. The ground state absorption (OD350nm) were matched at 0.2 for **5** and **3** and not corrected for the different light partition in **3**.The solution of **4** was adjusted to 0.15 on account of the different light partition in **3**.

**Figure S2**: Picosecond transient absorption spectrum (visible-near-infrared part) recorded 20 ps upon flash photolysis of reference **4** (dashed line) and **5** (solid line)(5.0  105 M) at 355 nmin deoxygenated toluene, indicating the C60 singlet-singlet (max = 880 nm) and C59N singlet-singlet features (max = 510, 740, and 940 nm), respectively.

**Figure S3**: Nanosecond transient absorption spectrum (visible-near-infrared part) recorded 50 ns upon flash photolysis of dyad **3** (5.0  105 M) at 355 nmin deoxygenated toluene, indicating the C59N triplet-triplet features (max = 390, 500, 650, 860, and 1040 nm),
